# Supplementary material for: Crystal structure and magnetic and photocatalytic properties of a new ternary rare-earth mixed chalcogenide, Dy4S4Te3
Source: Royal Society of Chemistry journal article supplement (doi:10.1039/c4ta04757e), 2014-01-01
Supplement: c4ta04757e1.pdf [file c4ta04757e1.pdf]

## Supporting Information

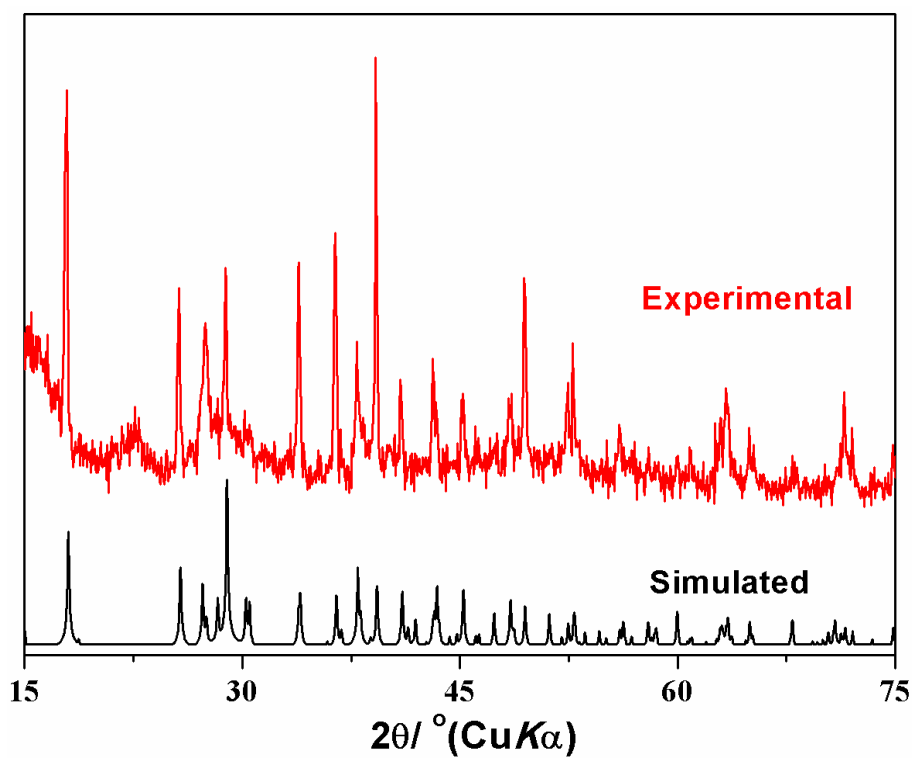

**Figure S1.** Calculated and observed powder X-ray diffraction patterns of Dy<sub>4</sub>S<sub>4</sub>Te<sub>3</sub>.

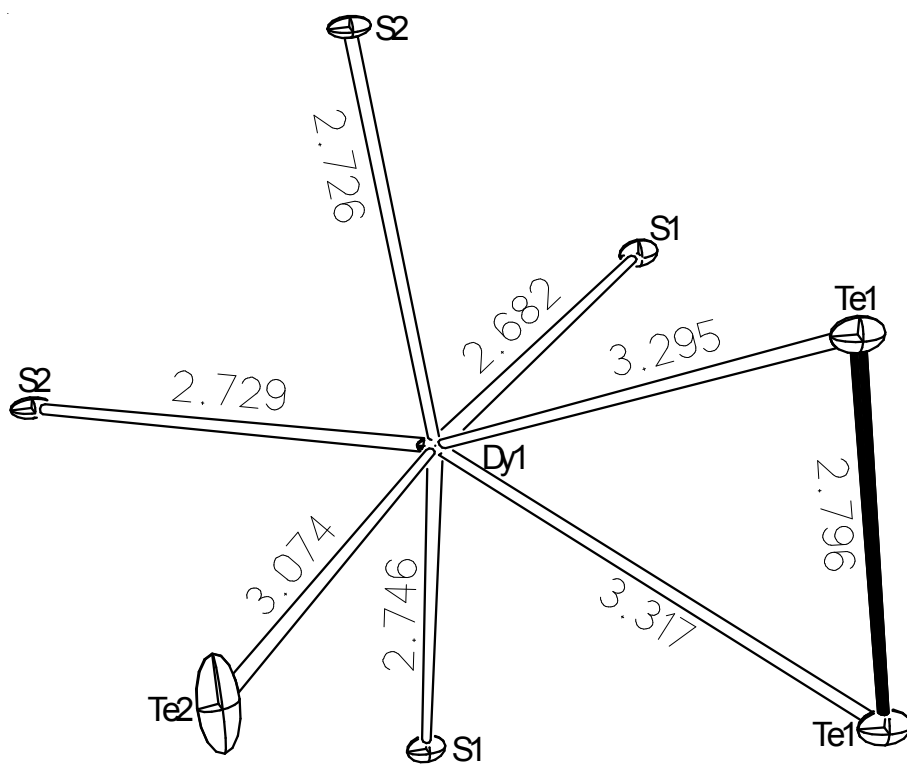

**Figure S2.** The coordination geometry of Dy<sub>4</sub>S<sub>4</sub>Te<sub>3</sub>.

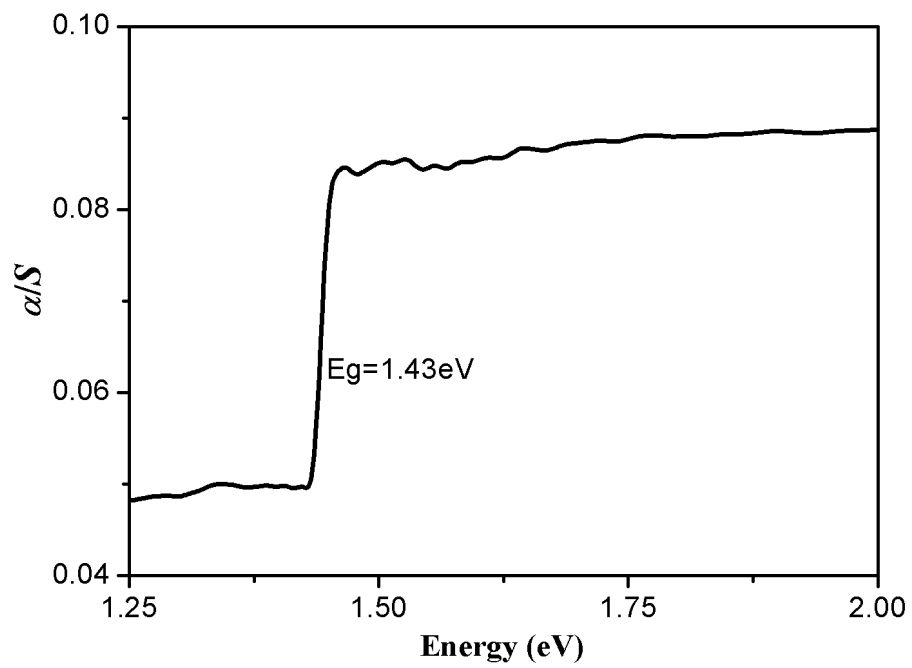

**Figure S3.** Diffuse reflection spectrum of  $\text{Dy}_4\text{S}_4\text{Te}_3$ .

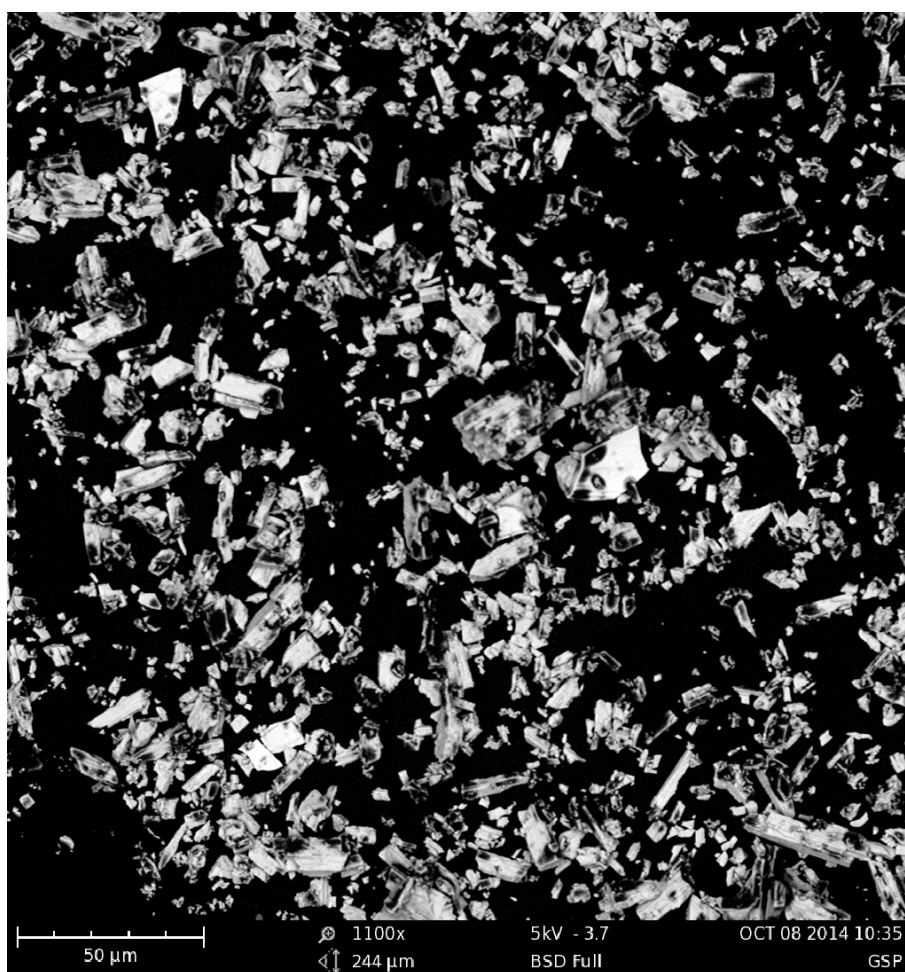

**Figure S4.** SEM image of the Dy<sub>4</sub>S<sub>4</sub>Te<sub>3</sub> powder used to measure its photocatalytic behavior.
